# Supplementary material for: Diversity of gammacoronaviruses and deltacoronaviruses in wild birds and poultry in Russia
Source: PubMed Central journal article supplement (PMC9653423; doi:10.1038/s41598-022-23925-z), 2022-11-12
Supplement: 41598_2022_23925_MOESM1_ESM.pdf [file 41598_2022_23925_MOESM1_ESM.pdf]

## **Diversity of gammacoronaviruses and deltacoronaviruses in wild birds and poultry in Russia**

Vasily Marchenko<sup>1,\*</sup>, Alexey Danilenko<sup>1</sup>, Nataliya Kolosova<sup>1</sup>, Maria Bragina<sup>1</sup>, Marina Molchanova<sup>1</sup>, Yuliya Bulanovich<sup>1</sup>, Vladimir Gorodov<sup>2</sup>, Sergey Leonov<sup>2</sup>, Andrey Gudymo<sup>1</sup>, Galina Onkhonova<sup>1</sup>, Svetlana Svyatchenko<sup>1</sup>, Alexander Ryzhikov<sup>1</sup>

1 – State Research Center of Virology and Biotechnology Vector Rospotrebnadzor, Koltsovo, 630559, Russia,

2 – Siberian Federal Scientific Centre of Agro-BioTechnologies, RAS, Novosibirsk, Russia

\*[marchenko\\_vyu@vector.nsc.ru](mailto:marchenko_vyu@vector.nsc.ru)

SUPPLEMENTARY INFORMATION

Supplementary Table 1. Summary of coronaviruses specimen data

| образец                                          | avian ID | Accession ID | size | coverage | Taxonomic name                      | Sample type  | Sampling location  | Date        |
|--------------------------------------------------|----------|--------------|------|----------|-------------------------------------|--------------|--------------------|-------------|
| AvCoV/black-headed gull/Novosibirsk/M2126/2020   | BN1      | OM925573     | 546  | 52907    | black-headed gull/gammacoronavirus  | Cloacal swab | Novosibirsk region | 20.10.2020  |
| AvCoV/common scoter/YaNAO-Russia/M21411/2020     | CY1      | OM970096     | 547  | 33924    | common scoter /gammacoronavirus     | Cloacal swab | YaNAO              | 13.10..2020 |
| AvCoV/common scoter/YaNAO-Russia/M21412/2020     | CY1      | OM970097     | 390  | 5850     | common scoter/gammacoronavirus      | Cloacal swab | YaNAO              | 13.10.2020  |
| AvCoV/tufted duck/YaNAO-Russia/M2135/2020        | TY1      | OM970098     | 547  | 43829    | tufted duck /gammacoronavirus       | Cloacal swab | YaNAO              | 13.10.2020  |
| AvCoV/common teal/YaNAO-Russia/M2133/2020        | CY2      | OM970099     | 547  | 56949    | common teal/gammacoronavirus        | Cloacal swab | YaNAO              | 13.10.2020  |
| AvCoV/common merganser/YaNAO-Russia/M2132/2020   | CY3      | OM970100     | 547  | 27489    | common merganser /gammacoronavirus  | Cloacal swab | YaNAO              | 13.10.2020  |
| AvCoV/gadwall/YaNAO-Russia/M21341/2020           | GY1      | OM970101     | 546  | 38686    | gadwall /gammacoronavirus           | Cloacal swab | YaNAO              | 13.10.2020  |
| AvCoV/siberian gull/YaNAO-Russia/M21361/2020     | SY1      | OM970102     | 547  | 33789    | siberian gull/gammacoronavirus      | Cloacal swab | YaNAO              | 13.10.2020  |
| AvCoV/northern shoveler/YaNAO-Russia/M21371/2020 | NY1      | OM970103     | 547  | 50795    | northern shoveler /gammacoronavirus | Cloacal swab | YaNAO              | 13.10.2020  |
| AvCoV/red-necked stint/Kamchatka/M21281/2020     | RK1      | OM970104     | 547  | 58124    | red-necked stint/gammacoronavirus   | Feces        | Kamchatka Krai     | 23.10.2020  |
| AvCoV/dunlin/Kamchatka/M21291/2020               | DK1      | OM970105     | 382  | 19753    | dunlin/gammacoronavirus             | Feces        | Kamchatka Krai     | 23.10.2020  |
| AvCoV/common teal/YaNAO-Russia/M2055/2020        | CY4      | OM970106     | 547  | 292      | common teal/gammacoronavirus        | Cloacal swab | YaNAO              | 13.10.2020  |
| AvCoV/mallard/YaNAO-Russia/M2056/2020            | MY1      | OM970107     | 547  | 17540    | mallard/gammacoronavirus            | Cloacal swab | YaNAO              | 13.10.2020  |
| AvCoV/rook/Novosibirsk/M20521/2020               | RN1      | OM970108     | 547  | 35942    | rook/gammacoronavirus               | Cloacal swab | Novosibirsk region | 20.10.2020  |
| AvCoV/rook/Novosibirsk/M20522/2020               | RN1      | OM970109     | 547  | 11894    | rook/gammacoronavirus               | Cloacal swab | Novosibirsk region | 20.10.2020  |
| AvCoV/chicken/Belgorod/M2057/2020                | CB1      | OM970110     | 547  | 4612     | chicken/gammacoronavirus            | Trachea      | Belgorod region    | 02.10.2020  |
| AvCoV/chicken/Belgorod/M2058/2020                | CB2      | OM970111     | 547  | 6977     | chicken/gammacoronavirus            | Lung         | Belgorod region    | 02.10.2020  |
| AvCoV/eurasian wigeon/YaNAO-Russia/M2328/2020    | EY1      | OM970112     | 382  | 106655   | eurasian wigeon /gammacoronavirus   | Cloacal swab | YaNAO              | 09.06.2020  |
| AvCoV/common sandpiper/Primorsky Krai/M2327/2020 | CP1      | OM970113     | 546  | 124456   | common sandpiper/gammacoronavirus   | Intestines   | Primorsky Krai     | 11.11.2020  |
| AvCoV/chicken/Sakhalin/M2330/2020                | CS1      | OM970114     | 394  | 103378   | chicken/gammacoronavirus            | Trachea      | Sakhalin region    | 05.06.2020  |
| AvCoV/chicken/Sakhalin/M2331/2020                | CS2      | OM970115     | 394  | 107169   | chicken/gammacoronavirus            | Trachea      | Sakhalin region    | 05.06.2020  |
| AvCoV/chicken/Sakhalin/M2333/2020                | CS3      | OM970116     | 394  | 133485   | chicken/gammacoronavirus            | Trachea      | Sakhalin region    | 11.12.2020  |
| AvCoV/chicken/Sakhalin/M2334/2020                | CS4      | OM970117     | 547  | 126662   | chicken/gammacoronavirus            | Trachea      | Sakhalin region    | 11.12.2020  |
| AvCoV/chicken/Sakhalin/M2335/2020                | CS5      | OM970118     | 547  | 121335   | chicken/gammacoronavirus            | Trachea      | Sakhalin region    | 11.12.2020  |
| AvCoV/chicken/Sakhalin/M2336/2020                | CS6      | OM970119     | 547  | 110239   | chicken/gammacoronavirus            | Trachea      | Sakhalin region    | 11.12.2020  |
| AvCoV/chicken/Sakhalin/M2337/2020                | CS7      | OM970120     | 547  | 54609    | chicken/gammacoronavirus            | Trachea      | Sakhalin region    | 11.12.2020  |
| AvCoV/mallard/Stavropol/M2338/2020               | MS1      | OM970121     | 546  | 128073   | mallard/gammacoronavirus            | Cloacal swab | Stavropol region   | 11.12.2020  |

|                                               |     |          |     |        |                                    |              |                    |            |
|-----------------------------------------------|-----|----------|-----|--------|------------------------------------|--------------|--------------------|------------|
| AvCoV/chicken/Astrakhan/M2339/2020            | CA1 | OM970122 | 382 | 99218  | chicken/gammacoronavirus           | Intestines   | Astrakhan region   | 21.12.2020 |
| AvCoV/dunlin/Kamchatka/M2130/2020             | DK2 | ON004931 | 547 | 48071  | dunlin/gammacoronavirus            | Feces        | Kamchatka Krai     | 23.10.2020 |
| AvCoV/herring gull/Novosibirsk/M20511/2020    | HN1 | ON605847 | 395 | 30886  | herring gull/gammacoronavirus      | Cloacal swab | Novosibirsk region | 20.10.2020 |
| AvCoV/herring gull/Novosibirsk/M20512/2020    | HN1 | ON605848 | 395 | 10201  | herring gull /gammacoronavirus     | Cloacal swab | Novosibirsk region | 20.10.2020 |
| AvCoV/red-necked stint/Kamchatka/M20531/2020  | RK2 | ON605849 | 395 | 8833   | red-necked stint/gammacoronavirus  | Feces        | Kamchatka Krai     | 23.10.2020 |
| AvCoV/chicken/Belgorod/M20572/2020            | CB1 | ON605853 | 395 | 322    | chicken/gammacoronavirus           | Trachea      | Belgorod region    | 02.10.2020 |
| AvCoV/red-necked stint/Kamchatka/M20532/2020  | RK2 | ON004916 | 579 | 35632  | red-necked stint/deltacoronavirus  | Feces        | Kamchatka Krai     | 23.10.2020 |
| AvCoV/red-necked stint/Kamchatka/M20533/2020  | RK2 | ON004917 | 579 | 9324   | red-necked stint/deltacoronavirus  | Feces        | Kamchatka Krai     | 23.10.2020 |
| AvCoV/dunlin/Kamchatka/M20541/2020            | DK3 | ON004918 | 579 | 20023  | dunlin/deltacoronavirus            | Feces        | Kamchatka Krai     | 23.10.2020 |
| AvCoV/dunlin/Kamchatka/M20542/2020            | DK3 | ON004919 | 579 | 3789   | dunlin/deltacoronavirus            | Feces        | Kamchatka Krai     | 23.10.2020 |
| AvCoV/gadwall/Novosibirsk/M2127/2020          | GN1 | ON004920 | 379 | 20     | gadwall/deltacoronavirus           | Cloacal swab | Novosibirsk region | 20.10.2020 |
| AvCoV/gadwall/YaNAO-Russia/M21342/2020        | GY1 | ON004921 | 379 | 9895   | gadwall/deltacoronavirus           | Cloacal swab | YaNAO              | 13.10.2020 |
| AvCoV/gadwall/YaNAO-Russia/M21343/2020        | GY1 | ON004922 | 379 | 2708   | gadwall/deltacoronavirus           | Cloacal swab | YaNAO              | 13.10.2020 |
| AvCoV/siberian gull/YaNAO-Russia/M21362/2020  | SY1 | ON004923 | 379 | 2356   | siberian gull/deltacoronavirus     | Cloacal swab | YaNAO              | 13.10.2020 |
| AvCoV/slaty-backed gull/Kamchatka/M2326/2020  | SK1 | ON004924 | 379 | 115188 | slaty-backed gull/deltacoronavirus | Feces        | Kamchatka Krai     | 09.06.2020 |
| AvCoV/red-necked stint/Kamchatka/M21282/2020  | RK1 | ON004925 | 379 | 1007   | red-necked stint/deltacoronavirus  | Feces        | Kamchatka Krai     | 23.10.2020 |
| AvCoV/dunlin/Kamchatka/M21292/2020            | DK1 | ON004926 | 542 | 27840  | dunlin/deltacoronavirus            | Feces        | Kamchatka Krai     | 23.10.2020 |
| AvCoV/dunlin/Kamchatka/M21293/2020            | DK1 | ON004927 | 379 | 7098   | dunlin/deltacoronavirus            | Feces        | Kamchatka Krai     | 23.10.2020 |
| AvCoV/dunlin/Kamchatka/M21302/2020            | DK2 | ON004928 | 542 | 2379   | dunlin/deltacoronavirus            | Feces        | Kamchatka Krai     | 23.10.2020 |
| AvCoV/dunlin/Kamchatka/M21303/2020            | DK2 | ON004929 | 542 | 15496  | dunlin/deltacoronavirus            | Feces        | Kamchatka Krai     | 23.10.2020 |
| AvCoV/dunlin/Kamchatka/M21311/2020            | DK4 | ON004930 | 542 | 35497  | dunlin/deltacoronavirus            | Feces        | Kamchatka Krai     | 23.10.2020 |
| AvCoV/eurasion wigeon/YaNAO-Russia/M2140/2020 | EY2 | ON605854 | 379 | 49598  | eurasion wigeon/deltacoronavirus   | Cloacal swab | YaNAO              | 13.10.2020 |
| AvCoV/hooded crow/YaNAO-Russia/M2139/2020     | HY1 | ON605855 | 379 | 36621  | hooded crow/deltacoronavirus       | Cloacal swab | YaNAO              | 13.10.2020 |
| AvCoV/pomarine jaeger/YaNAO-Russia/M2138/2020 | PY1 | ON605856 | 379 | 40254  | pomarine jaeger/deltacoronavirus   | Cloacal swab | YaNAO              | 13.10.2020 |

Supplementary Table S2. Identity matrix of the partial nucleotide sequence of the RdRp gene (360 nucleotides) of a tentative new clade in the duck line of gammacoronaviruses, identified species of gammacoronaviruses, representative viruses isolated in Russia, and viruses from studies in other countries.

|    |     | AvCoV/common scoter/YaNAO-Russia/M21411/2020 | AvCoV/tufted duck/YaNAO-Russia/M2135/2020 | AvCoV/eurasian wigeon/YaNAO-Russia/M2328/2020 | AvCoV/common teal/YaNAO-Russia/M2055/2020 | AvCoV/common merganser/YaNAO-Russia/M2132/2020 | AvCoV/common teal/YaNAO-Russia/M2133/2020 | MK617419.1 Avian coronavirus isolate Gamm8.aCoV/AvCoV/Tufted_duck/Poland/Mor65/20/2012 | JN788847.1 Avian coronavirus isolate J1482/Aythya | KT882615.1 Avian coronavirus isolate AvCoV/Aythya marila/67693/2007 | KT882617.1 Avian coronavirus isolate AvCoV/Aythya marila/67703/2007 | AvCoV/red-necked stint/Kamchatka/M21281/2020 | MG764126.1 Avian coronavirus isolate CoV-9068-2016/12/30-WS/VJC | NC_048214.1 Duck coronavirus isolate DK/GD/27/2014 | KT882616.1 AvCoV/Aythya marila/67699/2007 | KJ741881.1 Avian coronavirus strain OH38 | AvCoV/gadwall/YaNAO-Russia/M21341/2020 | MK204411.1 Avian coronavirus | MH453802.1 AvCoV/Red-necked Avocet/MW10/2013 | AvCoV/siberian gull/YaNAO-Russia/M21361/2020 | AvCoV/rook/Novosibirsk/M20522/2020 | DdCoV/DK/Guangdong/F40/2014 | MK204393.1 Avian coronavirus | NC_001451.1 Avian infectious bronchitis virus |
|----|-----|----------------------------------------------|-------------------------------------------|-----------------------------------------------|-------------------------------------------|------------------------------------------------|-------------------------------------------|----------------------------------------------------------------------------------------|---------------------------------------------------|---------------------------------------------------------------------|---------------------------------------------------------------------|----------------------------------------------|-----------------------------------------------------------------|----------------------------------------------------|-------------------------------------------|------------------------------------------|----------------------------------------|------------------------------|----------------------------------------------|----------------------------------------------|------------------------------------|-----------------------------|------------------------------|-----------------------------------------------|
|    | 1   | 2                                            | 3                                         | 4                                             | 5                                         | 6                                              | 7                                         | 8                                                                                      | 9                                                 | 10                                                                  | 11                                                                  | 12                                           | 13                                                              | 14                                                 | 15                                        | 16                                       | 17                                     | 18                           | 19                                           | 20                                           | 21                                 | 22                          | 23                           |                                               |
| 1  | ID  | 100                                          | 100                                       | 99                                            | 99                                        | 99                                             | 99                                        | 99                                                                                     | 99                                                | 99                                                                  | 90                                                                  | 90                                           | 90                                                              | 91                                                 | 91                                        | 91                                       | 91                                     | 91                           | 91                                           | 89                                           | 89                                 | 89                          | 89                           | 81                                            |
| 2  | 100 | ID                                           | 100                                       | 99                                            | 99                                        | 99                                             | 99                                        | 99                                                                                     | 99                                                | 99                                                                  | 90                                                                  | 90                                           | 90                                                              | 91                                                 | 91                                        | 91                                       | 91                                     | 91                           | 91                                           | 90                                           | 90                                 | 89                          | 89                           | 81                                            |
| 3  | 100 | 100                                          | ID                                        | 99                                            | 99                                        | 99                                             | 99                                        | 99                                                                                     | 99                                                | 99                                                                  | 90                                                                  | 90                                           | 90                                                              | 91                                                 | 91                                        | 91                                       | 91                                     | 91                           | 91                                           | 90                                           | 90                                 | 89                          | 89                           | 81                                            |
| 4  | 99  | 99                                           | 99                                        | ID                                            | 100                                       | 100                                            | 99                                        | 98                                                                                     | 99                                                | 98                                                                  | 90                                                                  | 90                                           | 90                                                              | 91                                                 | 91                                        | 91                                       | 91                                     | 91                           | 91                                           | 90                                           | 89                                 | 90                          | 89                           | 81                                            |
| 5  | 99  | 99                                           | 99                                        | 100                                           | ID                                        | 100                                            | 99                                        | 98                                                                                     | 99                                                | 98                                                                  | 90                                                                  | 90                                           | 90                                                              | 91                                                 | 91                                        | 91                                       | 91                                     | 91                           | 91                                           | 90                                           | 89                                 | 90                          | 89                           | 81                                            |
| 6  | 99  | 99                                           | 99                                        | 100                                           | 100                                       | ID                                             | 99                                        | 98                                                                                     | 99                                                | 98                                                                  | 90                                                                  | 90                                           | 90                                                              | 91                                                 | 91                                        | 91                                       | 91                                     | 91                           | 91                                           | 90                                           | 89                                 | 90                          | 89                           | 81                                            |
| 7  | 99  | 99                                           | 99                                        | 99                                            | 99                                        | 99                                             | ID                                        | 99                                                                                     | 100                                               | 99                                                                  | 90                                                                  | 90                                           | 90                                                              | 91                                                 | 91                                        | 91                                       | 91                                     | 91                           | 91                                           | 89                                           | 90                                 | 89                          | 89                           | 81                                            |
| 8  | 99  | 99                                           | 99                                        | 98                                            | 98                                        | 98                                             | 99                                        | ID                                                                                     | 99                                                | 99                                                                  | 90                                                                  | 90                                           | 90                                                              | 91                                                 | 91                                        | 91                                       | 91                                     | 91                           | 91                                           | 89                                           | 90                                 | 89                          | 89                           | 80                                            |
| 9  | 99  | 99                                           | 99                                        | 99                                            | 99                                        | 99                                             | 100                                       | 99                                                                                     | ID                                                | 99                                                                  | 90                                                                  | 90                                           | 90                                                              | 91                                                 | 91                                        | 91                                       | 91                                     | 91                           | 91                                           | 89                                           | 90                                 | 89                          | 89                           | 81                                            |
| 10 | 99  | 99                                           | 99                                        | 98                                            | 98                                        | 98                                             | 99                                        | 99                                                                                     | 99                                                | ID                                                                  | 90                                                                  | 90                                           | 90                                                              | 91                                                 | 91                                        | 90                                       | 91                                     | 91                           | 91                                           | 89                                           | 89                                 | 89                          | 89                           | 81                                            |
| 11 | 90  | 90                                           | 90                                        | 90                                            | 90                                        | 90                                             | 90                                        | 90                                                                                     | 90                                                | 90                                                                  | ID                                                                  | 100                                          | 95                                                              | 95                                                 | 97                                        | 94                                       | 97                                     | 96                           | 95                                           | 96                                           | 94                                 | 95                          | 83                           | 83                                            |
| 12 | 90  | 90                                           | 90                                        | 90                                            | 90                                        | 90                                             | 90                                        | 90                                                                                     | 90                                                | 90                                                                  | 100                                                                 | ID                                           | 96                                                              | 96                                                 | 98                                        | 94                                       | 97                                     | 96                           | 95                                           | 96                                           | 94                                 | 95                          | 83                           | 83                                            |
| 13 | 90  | 90                                           | 90                                        | 90                                            | 90                                        | 90                                             | 90                                        | 90                                                                                     | 90                                                | 90                                                                  | 95                                                                  | 96                                           | ID                                                              | 97                                                 | 98                                        | 96                                       | 98                                     | 97                           | 96                                           | 98                                           | 97                                 | 96                          | 82                           | 82                                            |
| 14 | 91  | 91                                           | 91                                        | 91                                            | 91                                        | 91                                             | 91                                        | 91                                                                                     | 91                                                | 91                                                                  | 95                                                                  | 96                                           | 97                                                              | ID                                                 | 98                                        | 95                                       | 98                                     | 97                           | 96                                           | 96                                           | 94                                 | 96                          | 81                           | 81                                            |
| 15 | 91  | 91                                           | 91                                        | 91                                            | 91                                        | 91                                             | 91                                        | 91                                                                                     | 91                                                | 91                                                                  | 97                                                                  | 98                                           | 98                                                              | 98                                                 | ID                                        | 97                                       | 99                                     | 98                           | 97                                           | 98                                           | 96                                 | 98                          | 82                           | 82                                            |
| 16 | 91  | 91                                           | 91                                        | 91                                            | 91                                        | 91                                             | 91                                        | 91                                                                                     | 91                                                | 90                                                                  | 94                                                                  | 94                                           | 96                                                              | 95                                                 | 97                                        | ID                                       | 96                                     | 95                           | 98                                           | 96                                           | 96                                 | 95                          | 81                           | 81                                            |
| 17 | 91  | 91                                           | 91                                        | 91                                            | 91                                        | 91                                             | 91                                        | 91                                                                                     | 91                                                | 91                                                                  | 97                                                                  | 97                                           | 98                                                              | 98                                                 | 99                                        | 96                                       | ID                                     | 99                           | 96                                           | 98                                           | 96                                 | 97                          | 82                           | 82                                            |
| 18 | 91  | 91                                           | 91                                        | 91                                            | 91                                        | 91                                             | 91                                        | 91                                                                                     | 91                                                | 91                                                                  | 96                                                                  | 96                                           | 97                                                              | 97                                                 | 98                                        | 95                                       | 99                                     | ID                           | 95                                           | 96                                           | 95                                 | 96                          | 81                           | 81                                            |
| 19 | 89  | 90                                           | 90                                        | 90                                            | 90                                        | 90                                             | 89                                        | 89                                                                                     | 89                                                | 89                                                                  | 95                                                                  | 95                                           | 96                                                              | 96                                                 | 97                                        | 98                                       | 96                                     | 95                           | ID                                           | 97                                           | 97                                 | 96                          | 81                           | 81                                            |
| 20 | 89  | 90                                           | 90                                        | 89                                            | 89                                        | 89                                             | 90                                        | 90                                                                                     | 90                                                | 89                                                                  | 96                                                                  | 96                                           | 98                                                              | 96                                                 | 98                                        | 96                                       | 98                                     | 96                           | 96                                           | 97                                           | ID                                 | 96                          | 82                           | 82                                            |
| 21 | 89  | 89                                           | 89                                        | 90                                            | 90                                        | 90                                             | 89                                        | 89                                                                                     | 89                                                | 89                                                                  | 94                                                                  | 94                                           | 97                                                              | 94                                                 | 96                                        | 96                                       | 96                                     | 95                           | 97                                           | 96                                           | 96                                 | ID                          | 95                           | 81                                            |
| 22 | 89  | 89                                           | 89                                        | 89                                            | 89                                        | 89                                             | 89                                        | 89                                                                                     | 89                                                | 89                                                                  | 95                                                                  | 95                                           | 96                                                              | 96                                                 | 98                                        | 95                                       | 97                                     | 96                           | 96                                           | 96                                           | 96                                 | 95                          | ID                           | 81                                            |
| 23 | 81  | 81                                           | 81                                        | 81                                            | 81                                        | 81                                             | 81                                        | 80                                                                                     | 81                                                | 81                                                                  | 83                                                                  | 83                                           | 82                                                              | 81                                                 | 82                                        | 81                                       | 82                                     | 81                           | 81                                           | 81                                           | 82                                 | 81                          | 81                           | ID                                            |

Supplementary Table S3. Identity matrix of the partial nucleotide sequence of the RdRp gene (357 nucleotides) of the tentative new deltacoronavirus clade and established deltacoronavirus species.

|    |     | AvCoV/red-necked stint/Kamchatka/M20532/2020 | AvCoV/red-necked stint/Kamchatka/M21282/2020 | AvCoV/dunlin/Kamchatka/M20542/2020 | AvCoV/dunlin/Kamchatka/M21302/2020 | AvCoV/dunlin/Kamchatka/M21292/2020 | AvCoV/dunlin/Kamchatka/M21311/2020 | MG764094.1 Avian coronavirus isolate CoV- | AvCoV/red-necked stint/Kamchatka/M20533/2020 | AvCoV/dunlin/Kamchatka/M21303/2020 | AvCoV/dunlin/Kamchatka/M20541/2020 | AvCoV/dunlin/Kamchatka/M21293/2020 | JX548304.1 Shorebird coronavirus isolate 85 | White-eye coronavirus HKU16 strain HKU16-6847 | LC364343.1 Houbara coronavirus UAE-HKU28 285F | Coronavirus HKU15 | Bulbul coronavirus HKU11-934 | Sparrow coronavirus HKU17 strain HKU17-6124 | Common-moorhen coronavirus HKU21 strain | Munia coronavirus HKU13-3514 | Night-heron coronavirus HKU19 |
|----|-----|----------------------------------------------|----------------------------------------------|------------------------------------|------------------------------------|------------------------------------|------------------------------------|-------------------------------------------|----------------------------------------------|------------------------------------|------------------------------------|------------------------------------|---------------------------------------------|-----------------------------------------------|-----------------------------------------------|-------------------|------------------------------|---------------------------------------------|-----------------------------------------|------------------------------|-------------------------------|
|    |     | 1                                            | 2                                            | 3                                  | 4                                  | 5                                  | 6                                  | 7                                         | 8                                            | 9                                  | 10                                 | 11                                 | 12                                          | 13                                            | 14                                            | 15                | 16                           | 17                                          | 18                                      | 19                           | 20                            |
| 1  | ID  | 100                                          | 99                                           | 99                                 | 99                                 | 99                                 | 99                                 | 99                                        | 89                                           | 89                                 | 89                                 | 89                                 | 92                                          | 80                                            | 76                                            | 76                | 76                           | 74                                          | 74                                      | 74                           | 69                            |
| 2  | 100 | ID                                           | 99                                           | 99                                 | 99                                 | 99                                 | 99                                 | 99                                        | 89                                           | 89                                 | 89                                 | 89                                 | 92                                          | 80                                            | 76                                            | 76                | 76                           | 74                                          | 74                                      | 74                           | 69                            |
| 3  | 99  | 99                                           | ID                                           | 100                                | 99                                 | 99                                 | 99                                 | 99                                        | 89                                           | 89                                 | 89                                 | 89                                 | 91                                          | 80                                            | 76                                            | 76                | 76                           | 75                                          | 75                                      | 73                           | 69                            |
| 4  | 99  | 99                                           | 100                                          | ID                                 | 100                                | 100                                | 99                                 | 88                                        | 88                                           | 88                                 | 88                                 | 88                                 | 91                                          | 79                                            | 76                                            | 76                | 76                           | 75                                          | 75                                      | 74                           | 69                            |
| 5  | 99  | 99                                           | 99                                           | 100                                | ID                                 | 100                                | 99                                 | 89                                        | 89                                           | 89                                 | 89                                 | 89                                 | 91                                          | 79                                            | 76                                            | 76                | 76                           | 75                                          | 74                                      | 74                           | 69                            |
| 6  | 99  | 99                                           | 99                                           | 100                                | 100                                | ID                                 | 99                                 | 89                                        | 89                                           | 89                                 | 89                                 | 89                                 | 91                                          | 79                                            | 76                                            | 76                | 76                           | 75                                          | 74                                      | 74                           | 69                            |
| 7  | 99  | 99                                           | 99                                           | 99                                 | 99                                 | 99                                 | ID                                 | 88                                        | 88                                           | 88                                 | 88                                 | 88                                 | 90                                          | 80                                            | 76                                            | 76                | 76                           | 75                                          | 74                                      | 73                           | 69                            |
| 8  | 89  | 89                                           | 89                                           | 88                                 | 89                                 | 89                                 | 88                                 | ID                                        | 100                                          | 100                                | 100                                | 97                                 | 77                                          | 75                                            | 75                                            | 73                | 74                           | 72                                          | 74                                      | 68                           |                               |
| 9  | 89  | 89                                           | 89                                           | 88                                 | 89                                 | 89                                 | 88                                 | 100                                       | ID                                           | 100                                | 100                                | 97                                 | 78                                          | 75                                            | 74                                            | 73                | 74                           | 72                                          | 73                                      | 68                           |                               |
| 10 | 89  | 89                                           | 89                                           | 88                                 | 89                                 | 89                                 | 88                                 | 100                                       | 100                                          | ID                                 | 100                                | 97                                 | 77                                          | 75                                            | 75                                            | 73                | 74                           | 72                                          | 74                                      | 68                           |                               |
| 11 | 89  | 89                                           | 89                                           | 88                                 | 89                                 | 89                                 | 88                                 | 100                                       | 100                                          | 100                                | ID                                 | 97                                 | 77                                          | 75                                            | 75                                            | 73                | 74                           | 72                                          | 74                                      | 68                           |                               |
| 12 | 92  | 92                                           | 91                                           | 91                                 | 91                                 | 91                                 | 90                                 | 97                                        | 97                                           | 97                                 | 97                                 | ID                                 | 80                                          | 75                                            | 74                                            | 73                | 74                           | 74                                          | 75                                      | 69                           |                               |
| 13 | 80  | 80                                           | 80                                           | 79                                 | 79                                 | 79                                 | 80                                 | 77                                        | 78                                           | 77                                 | 77                                 | 80                                 | ID                                          | 82                                            | 79                                            | 78                | 80                           | 78                                          | 77                                      | 68                           |                               |
| 14 | 76  | 76                                           | 76                                           | 76                                 | 76                                 | 76                                 | 76                                 | 75                                        | 75                                           | 75                                 | 75                                 | 75                                 | 82                                          | ID                                            | 76                                            | 76                | 75                           | 75                                          | 77                                      | 65                           |                               |
| 15 | 76  | 76                                           | 76                                           | 76                                 | 76                                 | 76                                 | 76                                 | 75                                        | 74                                           | 75                                 | 75                                 | 74                                 | 79                                          | 76                                            | ID                                            | 78                | 90                           | 73                                          | 80                                      | 69                           |                               |
| 16 | 76  | 76                                           | 76                                           | 76                                 | 76                                 | 76                                 | 76                                 | 73                                        | 73                                           | 73                                 | 73                                 | 73                                 | 78                                          | 76                                            | 78                                            | ID                | 76                           | 74                                          | 74                                      | 71                           |                               |
| 17 | 74  | 74                                           | 75                                           | 75                                 | 75                                 | 75                                 | 75                                 | 74                                        | 74                                           | 74                                 | 74                                 | 74                                 | 80                                          | 75                                            | 90                                            | 76                | ID                           | 76                                          | 79                                      | 68                           |                               |
| 18 | 74  | 74                                           | 75                                           | 75                                 | 74                                 | 74                                 | 74                                 | 72                                        | 72                                           | 72                                 | 72                                 | 74                                 | 78                                          | 75                                            | 73                                            | 74                | 76                           | ID                                          | 74                                      | 68                           |                               |
| 19 | 74  | 74                                           | 73                                           | 74                                 | 74                                 | 74                                 | 73                                 | 74                                        | 73                                           | 74                                 | 74                                 | 75                                 | 77                                          | 77                                            | 80                                            | 74                | 79                           | 74                                          | ID                                      | 67                           |                               |
| 20 | 69  | 69                                           | 69                                           | 69                                 | 69                                 | 69                                 | 69                                 | 68                                        | 68                                           | 68                                 | 68                                 | 69                                 | 68                                          | 65                                            | 69                                            | 71                | 68                           | 68                                          | 67                                      | ID                           |                               |
